# Supplementary material for: In search of structure–function relationships in transition-metal based rectifiers
Source: Royal Society of Chemistry journal article supplement (doi:10.1039/c4qi00038b), 2014-01-01
Supplement: c4qi00038b1.pdf [file c4qi00038b1.pdf]

# In search of structure-function relationships in transition-metal based rectifiers: the influence of spin polarisation.

Tingting Weng, Daniel DeBrincat, Vaida Arcisauskaite and John E. McGrady

## Supporting Information

1. Structure and stability of the low-lying spin states of  $\text{Ru}_2\text{Ni}(\text{dpa})_4(\text{NCS})_2$  and  $\text{Ru}_2\text{Cu}(\text{dpa})_4(\text{NCS})_2$  in the gas phase.

As described in the text, the electronic structure of these chains is best described as  $\{\text{Ru}_2\}^{5+}\text{M}^+$ . The local spin moment on the  $\{\text{Ru}_2\}^{5+}$  unit is  $3/2$ , that on  $\text{Ni}^+$  is  $S = 1/2$  and  $\text{Cu}^+$  is diamagnetic. For  $\text{Ru}_2\text{Cu}(\text{dpa})_4(\text{NCS})_2$  there is therefore only a single low-lying spin state,  $S_{\text{tot}}=3/2$ . For  $\text{Ru}_2\text{Ni}(\text{dpa})_4(\text{NCS})_2$  there are two states,  $S_{\text{tot}}=2$  and  $S_{\text{tot}}=1$ , corresponding to ferro- and antiferromagnetic coupling between the subunits, respectively. Relative energies of these spin states and their optimised Cartesian coordinates are presented below. In the  $\text{Ru}_2\text{Ni}(\text{dpa})_4(\text{NCS})_2$  case the ferromagnetic  $S_{\text{tot}}=2$  state is most stable, indicating that ferromagnetic coupling prevails: this is to be expected as the Ni SOMO, the  $d_{x^2-y^2}$  orbital, is approximately orthogonal to all three SOMOs on  $\{\text{Ru}_2\}$  ( $\pi_{xz}, \pi_{yz}, \delta$ ). The optimised structural parameters of the two states are almost identical.

**Table S1** Optimised coordinates of  $\text{Ru}_2\text{Ni}(\text{dpa})_4(\text{NCS})_2$

$S_{\text{tot}}=2$  ( $E_{\text{rel}} = 0$  eV)

|    |           |           |           |
|----|-----------|-----------|-----------|
| Ru | 0.000000  | 0.000000  | 2.253911  |
| Ru | 0.000000  | 0.000000  | -0.112716 |
| Ni | 0.000000  | 0.000000  | -2.538490 |
| N  | 2.092655  | -0.273966 | 2.141182  |
| N  | 2.020053  | 0.382590  | -0.096116 |
| N  | 1.844897  | 1.029799  | -2.318059 |
| N  | 0.273362  | 2.092707  | 2.141459  |
| N  | -0.382665 | 2.020038  | -0.096004 |
| N  | -1.030292 | 1.844711  | -2.317782 |
| N  | -2.092655 | 0.273966  | 2.141182  |
| N  | -2.020053 | -0.382590 | -0.096116 |
| N  | -1.844897 | -1.029799 | -2.318059 |
| N  | -0.273362 | -2.092707 | 2.141459  |
| N  | 0.382665  | -2.020038 | -0.096004 |
| N  | 1.030292  | -1.844711 | -2.317782 |
| C  | 2.771621  | -0.757696 | 3.206641  |
| H  | 2.175838  | -0.895600 | 4.106418  |
| C  | 4.120234  | -1.056572 | 3.175046  |
| H  | 4.609439  | -1.437307 | 4.070653  |
| C  | 4.809693  | -0.886415 | 1.970077  |
| H  | 5.863050  | -1.158691 | 1.886403  |
| C  | 4.135992  | -0.397740 | 0.869396  |
| H  | 4.634315  | -0.307297 | -0.094901 |
| C  | 2.769186  | -0.060785 | 0.961983  |
| C  | 2.548065  | 1.088778  | -1.154430 |
| C  | 3.676726  | 1.925069  | -1.044160 |
| H  | 4.173636  | 2.029612  | -0.080450 |
| C  | 4.107426  | 2.644151  | -2.143837 |
| H  | 4.975009  | 3.300671  | -2.057694 |
| C  | 3.406146  | 2.541104  | -3.346978 |
| H  | 3.710994  | 3.085003  | -4.240469 |
| C  | 2.274455  | 1.741819  | -3.375761 |

|   |           |           |           |
|---|-----------|-----------|-----------|
| H | 1.666341  | 1.641348  | -4.275386 |
| C | 0.756153  | 2.771960  | 3.207175  |
| H | 0.894821  | 2.176066  | 4.106754  |
| C | 1.053085  | 4.121008  | 3.176086  |
| H | 1.433093  | 4.610418  | 4.071890  |
| C | 0.881941  | 4.810705  | 1.971385  |
| H | 1.152607  | 5.864510  | 1.888163  |
| C | 0.394380  | 4.136692  | 0.870406  |
| H | 0.303254  | 4.635230  | -0.093716 |
| C | 0.059446  | 2.769345  | 0.962473  |
| C | -1.090057 | 2.547370  | -1.153875 |
| C | -1.928163 | 3.674605  | -1.042934 |
| H | -2.033262 | 4.170968  | -0.078999 |
| C | -2.648275 | 4.104530  | -2.142245 |
| H | -3.306240 | 4.970966  | -2.055566 |
| C | -2.544364 | 3.403927  | -3.345702 |
| H | -3.088977 | 3.708255  | -4.238935 |
| C | -1.743241 | 2.273547  | -3.375140 |
| H | -1.642059 | 1.665911  | -4.275014 |
| C | -2.771621 | 0.757696  | 3.206641  |
| H | -2.175838 | 0.895600  | 4.106418  |
| C | -4.120234 | 1.056572  | 3.175046  |
| H | -4.609439 | 1.437307  | 4.070653  |
| C | -4.809693 | 0.886415  | 1.970077  |
| H | -5.863050 | 1.158691  | 1.886403  |
| C | -4.135992 | 0.397740  | 0.869396  |
| H | -4.634315 | 0.307297  | -0.094901 |
| C | -2.769186 | 0.060785  | 0.961983  |
| C | -2.548065 | -1.088778 | -1.154430 |
| C | -3.676726 | -1.925069 | -1.044160 |
| H | -4.173636 | -2.029612 | -0.080450 |
| C | -4.107426 | -2.644151 | -2.143837 |
| H | -4.975009 | -3.300671 | -2.057694 |
| C | -3.406146 | -2.541104 | -3.346978 |
| H | -3.710994 | -3.085003 | -4.240469 |
| C | -2.274455 | -1.741819 | -3.375761 |
| H | -1.666341 | -1.641348 | -4.275386 |
| C | -0.756153 | -2.771960 | 3.207175  |
| H | -0.894821 | -2.176066 | 4.106754  |
| C | -1.053085 | -4.121008 | 3.176086  |
| H | -1.433093 | -4.610418 | 4.071890  |
| C | -0.881941 | -4.810705 | 1.971385  |
| H | -1.152607 | -5.864510 | 1.888163  |
| C | -0.394380 | -4.136692 | 0.870406  |
| H | -0.303254 | -4.635230 | -0.093716 |
| C | -0.059446 | -2.769345 | 0.962473  |
| C | 1.090057  | -2.547370 | -1.153875 |
| C | 1.928163  | -3.674605 | -1.042934 |
| H | 2.033262  | -4.170968 | -0.078999 |
| C | 2.648275  | -4.104530 | -2.142245 |
| H | 3.306240  | -4.970966 | -2.055566 |
| C | 2.544364  | -3.403927 | -3.345702 |
| H | 3.088977  | -3.708255 | -4.238935 |
| C | 1.743241  | -2.273547 | -3.375140 |
| H | 1.642059  | -1.665911 | -4.275014 |
| N | 0.000000  | 0.000000  | 4.406359  |
| C | 0.000000  | 0.000000  | 5.606580  |
| S | 0.000000  | 0.000000  | 7.221941  |
| N | 0.000000  | 0.000000  | -4.586071 |
| C | 0.000000  | 0.000000  | -5.781586 |
| S | 0.000000  | 0.000000  | -7.401590 |

S<sub>tot</sub>=1 (E<sub>rel</sub> = 0.10 eV)

|    |           |           |           |
|----|-----------|-----------|-----------|
| Ru | 0.000000  | 0.000000  | 2.260071  |
| Ru | 0.000000  | 0.000000  | -0.097234 |
| Ni | 0.000000  | 0.000000  | -2.543455 |
| N  | 2.096896  | -0.276237 | 2.144031  |
| N  | 2.021498  | 0.359701  | -0.098947 |
| N  | 1.856591  | 0.981606  | -2.332906 |
| N  | 0.275579  | 2.096963  | 2.144279  |
| N  | -0.359741 | 2.021549  | -0.098893 |
| N  | -0.982092 | 1.856485  | -2.332664 |
| N  | -2.096896 | 0.276237  | 2.144031  |
| N  | -2.021498 | -0.359701 | -0.098947 |
| N  | -1.856591 | -0.981606 | -2.332906 |
| N  | -0.275579 | -2.096963 | 2.144279  |
| N  | 0.359741  | -2.021549 | -0.098893 |
| N  | 0.982092  | -1.856485 | -2.332664 |
| C  | 2.778152  | -0.747579 | 3.213419  |
| H  | 2.182793  | -0.883219 | 4.113920  |
| C  | 4.128920  | -1.036946 | 3.185026  |
| H  | 4.620064  | -1.408005 | 4.083587  |
| C  | 4.818395  | -0.869195 | 1.979470  |
| H  | 5.874173  | -1.133024 | 1.899109  |
| C  | 4.142304  | -0.394407 | 0.874481  |
| H  | 4.640944  | -0.304900 | -0.089803 |
| C  | 2.772070  | -0.068549 | 0.962907  |
| C  | 2.544918  | 1.064637  | -1.161226 |
| C  | 3.655992  | 1.922786  | -1.044839 |
| H  | 4.134614  | 2.048147  | -0.074150 |
| C  | 4.093684  | 2.633338  | -2.147353 |
| H  | 4.950364  | 3.303501  | -2.057380 |
| C  | 3.410562  | 2.504384  | -3.358153 |
| H  | 3.721974  | 3.037611  | -4.255860 |
| C  | 2.289518  | 1.690447  | -3.391980 |
| H  | 1.693376  | 1.571999  | -4.297324 |
| C  | 0.745853  | 2.778498  | 3.213972  |
| H  | 0.882254  | 2.183014  | 4.114270  |
| C  | 1.033173  | 4.129703  | 3.186133  |
| H  | 1.403434  | 4.621040  | 4.084919  |
| C  | 0.864442  | 4.819428  | 1.980861  |
| H  | 1.126599  | 5.875655  | 1.900976  |
| C  | 0.390867  | 4.143035  | 0.875539  |
| H  | 0.300677  | 4.641907  | -0.088560 |
| C  | 0.067118  | 2.772275  | 0.963396  |
| C  | -1.065889 | 2.544271  | -1.160717 |
| C  | -1.925767 | 3.653925  | -1.043713 |
| H  | -2.051696 | 4.131968  | -0.072809 |
| C  | -2.637197 | 4.090956  | -2.145927 |
| H  | -3.308711 | 4.946532  | -2.055470 |
| C  | -2.507359 | 3.408585  | -3.357039 |
| H  | -3.041193 | 3.719584  | -4.254531 |
| C  | -1.691725 | 2.288780  | -3.391452 |
| H  | -1.572618 | 1.693105  | -4.297022 |
| C  | -2.778152 | 0.747579  | 3.213419  |
| H  | -2.182793 | 0.883219  | 4.113920  |
| C  | -4.128920 | 1.036946  | 3.185026  |
| H  | -4.620064 | 1.408005  | 4.083587  |
| C  | -4.818395 | 0.869195  | 1.979470  |
| H  | -5.874173 | 1.133024  | 1.899109  |
| C  | -4.142304 | 0.394407  | 0.874481  |
| H  | -4.640944 | 0.304900  | -0.089803 |
| C  | -2.772070 | 0.068549  | 0.962907  |
| C  | -2.544918 | -1.064637 | -1.161226 |
| C  | -3.655992 | -1.922786 | -1.044839 |
| H  | -4.134614 | -2.048147 | -0.074150 |
| C  | -4.093684 | -2.633338 | -2.147353 |
| H  | -4.950364 | -3.303501 | -2.057380 |

|   |           |           |           |
|---|-----------|-----------|-----------|
| C | -3.410562 | -2.504384 | -3.358153 |
| H | -3.721974 | -3.037611 | -4.255860 |
| C | -2.289518 | -1.690447 | -3.391980 |
| H | -1.693376 | -1.571999 | -4.297324 |
| C | -0.745853 | -2.778498 | 3.213972  |
| H | -0.882254 | -2.183014 | 4.114270  |
| C | -1.033173 | -4.129703 | 3.186133  |
| H | -1.403434 | -4.621040 | 4.084919  |
| C | -0.864442 | -4.819428 | 1.980861  |
| H | -1.126599 | -5.875655 | 1.900976  |
| C | -0.390867 | -4.143035 | 0.875539  |
| H | -0.300677 | -4.641907 | -0.088560 |
| C | -0.067118 | -2.772275 | 0.963396  |
| C | 1.065889  | -2.544271 | -1.160717 |
| C | 1.925767  | -3.653925 | -1.043713 |
| H | 2.051696  | -4.131968 | -0.072809 |
| C | 2.637197  | -4.090956 | -2.145927 |
| H | 3.308711  | -4.946532 | -2.055470 |
| C | 2.507359  | -3.408585 | -3.357039 |
| H | 3.041193  | -3.719584 | -4.254531 |
| C | 1.691725  | -2.288780 | -3.391452 |
| H | 1.572618  | -1.693105 | -4.297022 |
| N | 0.000000  | 0.000000  | 4.428487  |
| C | 0.000000  | 0.000000  | 5.628988  |
| S | 0.000000  | 0.000000  | 7.243383  |
| N | 0.000000  | 0.000000  | -4.594759 |
| C | 0.000000  | 0.000000  | -5.790078 |
| S | 0.000000  | 0.000000  | -7.411351 |

**Table S1** Optimised coordinates of bent Ru<sub>2</sub>Ni(dpa)<sub>4</sub>(NCS)<sub>2</sub>

S<sub>tot</sub>=2 (E<sub>rel</sub> = -0.05 eV)

|    |           |           |           |
|----|-----------|-----------|-----------|
| Ru | 0.034264  | 0.028642  | 2.253214  |
| Ru | -0.066977 | -0.084777 | -0.118148 |
| Ni | 0.030471  | 0.045218  | -2.543317 |
| N  | 2.102747  | -0.258031 | 2.134077  |
| N  | 1.975693  | 0.333120  | -0.124554 |
| N  | 1.821223  | 1.042846  | -2.334199 |
| N  | 0.320454  | 2.087344  | 2.109003  |
| N  | -0.411320 | 1.965388  | -0.105060 |
| N  | -1.040739 | 1.827568  | -2.338471 |
| N  | -2.078387 | 0.305317  | 2.150002  |
| N  | -2.065272 | -0.430746 | -0.062778 |
| N  | -1.879976 | -1.050138 | -2.286202 |
| N  | -0.245885 | -2.094426 | 2.162579  |
| N  | 0.351167  | -2.073227 | -0.093855 |
| N  | 1.038347  | -1.851972 | -2.297682 |
| C  | 2.804787  | -0.713698 | 3.198004  |
| H  | 2.228082  | -0.825389 | 4.113976  |
| C  | 4.151507  | -1.014604 | 3.141787  |
| H  | 4.662702  | -1.369785 | 4.035678  |
| C  | 4.811881  | -0.879678 | 1.915346  |
| H  | 5.863036  | -1.154726 | 1.814714  |
| C  | 4.111123  | -0.424362 | 0.817330  |
| H  | 4.585785  | -0.359315 | -0.161217 |
| C  | 2.747303  | -0.081103 | 0.931922  |
| C  | 2.499515  | 1.079875  | -1.154655 |
| C  | 3.609811  | 1.938792  | -1.009101 |
| H  | 4.091229  | 2.029788  | -0.036147 |
| C  | 4.043827  | 2.691965  | -2.083001 |
| H  | 4.895822  | 3.363779  | -1.965054 |
| C  | 3.367882  | 2.604040  | -3.303243 |
| H  | 3.679601  | 3.173841  | -4.177892 |
| C  | 2.253684  | 1.785288  | -3.370143 |

|   |           |           |           |
|---|-----------|-----------|-----------|
| H | 1.661139  | 1.689962  | -4.281044 |
| C | 0.847396  | 2.782487  | 3.143953  |
| H | 0.996760  | 2.204994  | 4.054297  |
| C | 1.168157  | 4.123354  | 3.067463  |
| H | 1.581557  | 4.630931  | 3.937981  |
| C | 0.975088  | 4.782667  | 1.847842  |
| H | 1.263492  | 5.828183  | 1.727858  |
| C | 0.441834  | 4.090562  | 0.780085  |
| H | 0.330958  | 4.567117  | -0.193164 |
| C | 0.080069  | 2.732445  | 0.916932  |
| C | -1.109542 | 2.507534  | -1.161941 |
| C | -1.952529 | 3.630092  | -1.038447 |
| H | -2.057915 | 4.113340  | -0.067635 |
| C | -2.673208 | 4.071743  | -2.132269 |
| H | -3.335097 | 4.934053  | -2.035012 |
| C | -2.566799 | 3.386567  | -3.345020 |
| H | -3.115064 | 3.698247  | -4.233473 |
| C | -1.757484 | 2.263533  | -3.391097 |
| H | -1.651933 | 1.669461  | -4.299047 |
| C | -2.732588 | 0.834948  | 3.208641  |
| H | -2.119679 | 1.003803  | 4.090818  |
| C | -4.079244 | 1.145802  | 3.195736  |
| H | -4.543936 | 1.565301  | 4.087060  |
| C | -4.797052 | 0.937265  | 2.014325  |
| H | -5.849600 | 1.216019  | 1.943083  |
| C | -4.151747 | 0.399955  | 0.919183  |
| H | -4.671551 | 0.279332  | -0.030088 |
| C | -2.786435 | 0.055761  | 0.995449  |
| C | -2.603823 | -1.109638 | -1.135538 |
| C | -3.750676 | -1.920450 | -1.047055 |
| H | -4.266522 | -2.018868 | -0.092693 |
| C | -4.173388 | -2.628258 | -2.158272 |
| H | -5.055243 | -3.267848 | -2.091816 |
| C | -3.445917 | -2.536090 | -3.345571 |
| H | -3.741114 | -3.074383 | -4.245734 |
| C | -2.300688 | -1.753344 | -3.351546 |
| H | -1.677922 | -1.664035 | -4.241696 |
| C | -0.701884 | -2.758525 | 3.249128  |
| H | -0.846523 | -2.147202 | 4.136124  |
| C | -0.969411 | -4.115015 | 3.259285  |
| H | -1.330105 | -4.585068 | 4.173348  |
| C | -0.793801 | -4.835971 | 2.075353  |
| H | -1.037448 | -5.898400 | 2.025655  |
| C | -0.338964 | -4.179162 | 0.949527  |
| H | -0.249653 | -4.699807 | -0.002931 |
| C | -0.041089 | -2.803006 | 1.000557  |
| C | 1.083762  | -2.577029 | -1.144931 |
| C | 1.929237  | -3.699413 | -1.040670 |
| H | 2.026392  | -4.211119 | -0.084240 |
| C | 2.668967  | -4.104739 | -2.136329 |
| H | 3.332631  | -4.967256 | -2.053838 |
| C | 2.575370  | -3.386904 | -3.330085 |
| H | 3.133340  | -3.673817 | -4.220786 |
| C | 1.767175  | -2.260918 | -3.351294 |
| H | 1.674354  | -1.640051 | -4.243086 |
| N | 0.003563  | 0.009168  | 4.370882  |
| C | -0.105092 | -0.073450 | 5.562972  |
| S | -0.243400 | -0.174993 | 7.169387  |
| N | -0.004325 | -0.020413 | -4.557146 |
| C | -0.150189 | -0.092489 | -5.740934 |
| S | -0.347807 | -0.181555 | -7.345641 |

**Table S1** Optimised coordinates of Ru<sub>2</sub>Cu(dpa)<sub>4</sub>(NCS)<sub>2</sub>S<sub>tot</sub>=3/2 (E<sub>rel</sub> = 0 ev) (only accessible state as Cu<sup>+</sup> is diamagnetic)

|    |           |           |           |
|----|-----------|-----------|-----------|
| Ru | 0.000000  | 0.000000  | -2.195172 |
| Ru | 0.000000  | 0.000000  | 0.152430  |
| Cu | 0.000000  | 0.000000  | 2.731420  |
| N  | -1.783008 | 1.283046  | 2.347242  |
| N  | -1.228236 | 1.657693  | 0.123853  |
| N  | -0.639793 | 2.014161  | -2.103193 |
| N  | -1.282954 | -1.782253 | 2.347456  |
| N  | -1.657854 | -1.227956 | 0.123989  |
| N  | -2.014359 | -0.639304 | -2.102994 |
| N  | 1.783008  | -1.283046 | 2.347242  |
| N  | 1.228236  | -1.657693 | 0.123853  |
| N  | 0.639793  | -2.014161 | -2.103193 |
| N  | 1.282954  | 1.782253  | 2.347456  |
| N  | 1.657854  | 1.227956  | 0.123989  |
| N  | 2.014359  | 0.639304  | -2.102994 |
| C  | -2.651550 | 1.340203  | 3.369352  |
| H  | -2.294979 | 0.901783  | 4.303593  |
| C  | -3.908680 | 1.918317  | 3.270602  |
| H  | -4.563946 | 1.956778  | 4.140314  |
| C  | -4.303932 | 2.415767  | 2.027086  |
| H  | -5.302274 | 2.833422  | 1.885052  |
| C  | -3.426700 | 2.351327  | 0.959154  |
| H  | -3.730279 | 2.682309  | -0.034090 |
| C  | -2.144111 | 1.802280  | 1.148683  |
| C  | -1.162794 | 2.519260  | -0.934944 |
| C  | -1.511792 | 3.885511  | -0.860788 |
| H  | -1.852794 | 4.287045  | 0.092691  |
| C  | -1.371980 | 4.700789  | -1.964507 |
| H  | -1.630958 | 5.758618  | -1.895351 |
| C  | -0.866260 | 4.165935  | -3.154550 |
| H  | -0.735134 | 4.772211  | -4.049868 |
| C  | -0.498803 | 2.834178  | -3.169656 |
| H  | -0.078622 | 2.368862  | -4.058292 |
| C  | -1.341093 | -2.650227 | 3.370026  |
| H  | -0.901535 | -2.293995 | 4.303850  |
| C  | -1.921563 | -3.906330 | 3.272196  |
| H  | -1.960665 | -4.561119 | 4.142238  |
| C  | -2.420615 | -4.301207 | 2.029207  |
| H  | -2.840265 | -5.298817 | 1.887920  |
| C  | -2.355228 | -3.424600 | 0.960840  |
| H  | -2.687416 | -3.728031 | -0.032039 |
| C  | -1.803595 | -2.142959 | 1.149365  |
| C  | -2.519787 | -1.161402 | -0.934462 |
| C  | -3.886559 | -1.508196 | -0.859707 |
| H  | -4.288330 | -1.848133 | 0.094054  |
| C  | -4.701957 | -1.367682 | -1.963257 |
| H  | -5.760163 | -1.625001 | -1.893642 |
| C  | -4.166710 | -0.863349 | -3.153706 |
| H  | -4.773033 | -0.731821 | -4.048934 |
| C  | -2.834454 | -0.497692 | -3.169306 |
| H  | -2.368830 | -0.078382 | -4.058194 |
| C  | 2.651550  | -1.340203 | 3.369352  |
| H  | 2.294979  | -0.901783 | 4.303593  |
| C  | 3.908680  | -1.918317 | 3.270602  |
| H  | 4.563946  | -1.956778 | 4.140314  |
| C  | 4.303932  | -2.415767 | 2.027086  |
| H  | 5.302274  | -2.833422 | 1.885052  |
| C  | 3.426700  | -2.351327 | 0.959154  |
| H  | 3.730279  | -2.682309 | -0.034090 |
| C  | 2.144111  | -1.802280 | 1.148683  |
| C  | 1.162794  | -2.519260 | -0.934944 |
| C  | 1.511792  | -3.885511 | -0.860788 |

|   |          |           |           |
|---|----------|-----------|-----------|
| H | 1.852794 | -4.287045 | 0.092691  |
| C | 1.371980 | -4.700789 | -1.964507 |
| H | 1.630958 | -5.758618 | -1.895351 |
| C | 0.866260 | -4.165935 | -3.154550 |
| H | 0.735134 | -4.772211 | -4.049868 |
| C | 0.498803 | -2.834178 | -3.169656 |
| H | 0.078622 | -2.368862 | -4.058292 |
| C | 1.341093 | 2.650227  | 3.370026  |
| H | 0.901535 | 2.293995  | 4.303850  |
| C | 1.921563 | 3.906330  | 3.272196  |
| H | 1.960665 | 4.561119  | 4.142238  |
| C | 2.420615 | 4.301207  | 2.029207  |
| H | 2.840265 | 5.298817  | 1.887920  |
| C | 2.355228 | 3.424600  | 0.960840  |
| H | 2.687416 | 3.728031  | -0.032039 |
| C | 1.803595 | 2.142959  | 1.149365  |
| C | 2.519787 | 1.161402  | -0.934462 |
| C | 3.886559 | 1.508196  | -0.859707 |
| H | 4.288330 | 1.848133  | 0.094054  |
| C | 4.701957 | 1.367682  | -1.963257 |
| H | 5.760163 | 1.625001  | -1.893642 |
| C | 4.166710 | 0.863349  | -3.153706 |
| H | 4.773033 | 0.731821  | -4.048934 |
| C | 2.834454 | 0.497692  | -3.169306 |
| H | 2.368830 | 0.078382  | -4.058194 |
| N | 0.000000 | 0.000000  | -4.305466 |
| C | 0.000000 | 0.000000  | -5.505724 |
| S | 0.000000 | 0.000000  | -7.118103 |
| N | 0.000000 | 0.000000  | 4.698600  |
| C | 0.000000 | 0.000000  | 5.892232  |
| S | 0.000000 | 0.000000  | 7.512159  |

2. The **eigenvalues of the projected self-consistent Hamiltonian** are complementary to the transmission peaks: there is an approximate 1:1 correspondence between the positions of the peaks and the eigenvalues, although channels of  $\delta$  symmetry do not appear in the transmission due to weak coupling with the surface. In Figure S1 the key feature is that the spin- $\beta$   $\pi^*$  channel enters the bias window only under forward bias while the spin- $\alpha$   $\pi^*$  channel enters only under reverse bias.

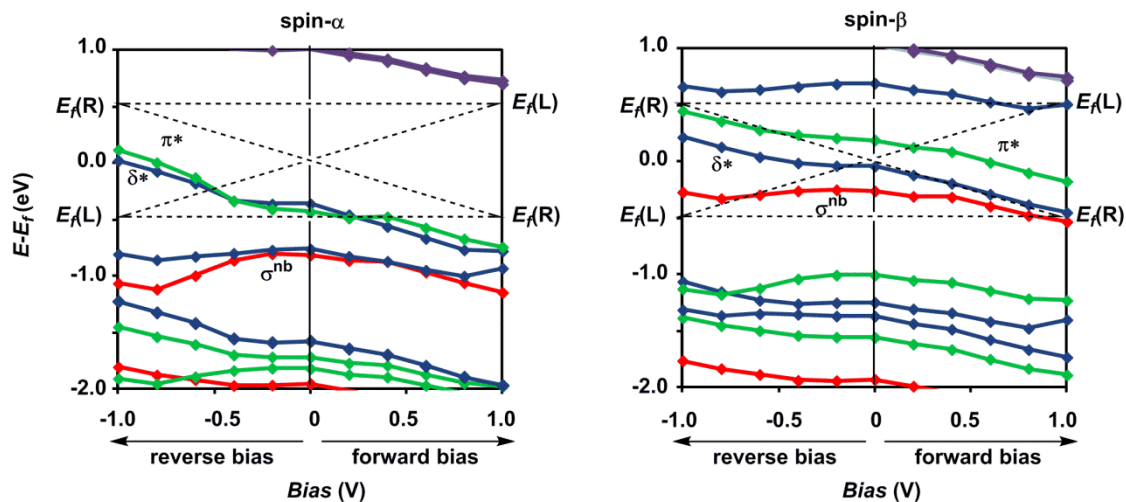

**Figure S1** Eigenvalues of the Molecular Projected Self-Consistent Hamiltonian (MPSH) for  $\text{Ru}_2\text{Ni}(\text{dpa})_4(\text{NCS})_2$  under forward and reverse bias.



### 3. Dependence of transmission spectra on functional

The transmission spectra shown in the text are computed using the LDA functional with the Perdew-Zunger correction for self interaction. Figure S2 shows the corresponding figure for  $\text{Ru}_2\text{Ni}(\text{dpa})_4(\text{NCS})_2$  computed using the PBE functional. The key features are identical to those in the main text: the distinction between the spin- $\alpha$  and spin- $\beta$  components of  $\pi^*$  is maintained, although the PBE functional imposes a marginally greater separation between the two. As a result, the spin- $\alpha$   $\pi^*$  and  $\sigma^{\text{nb}}$  peaks merge in the PBE transmission (the presence of a shoulder in the feature at -0.7 eV confirms the contribution of two distinct bands).

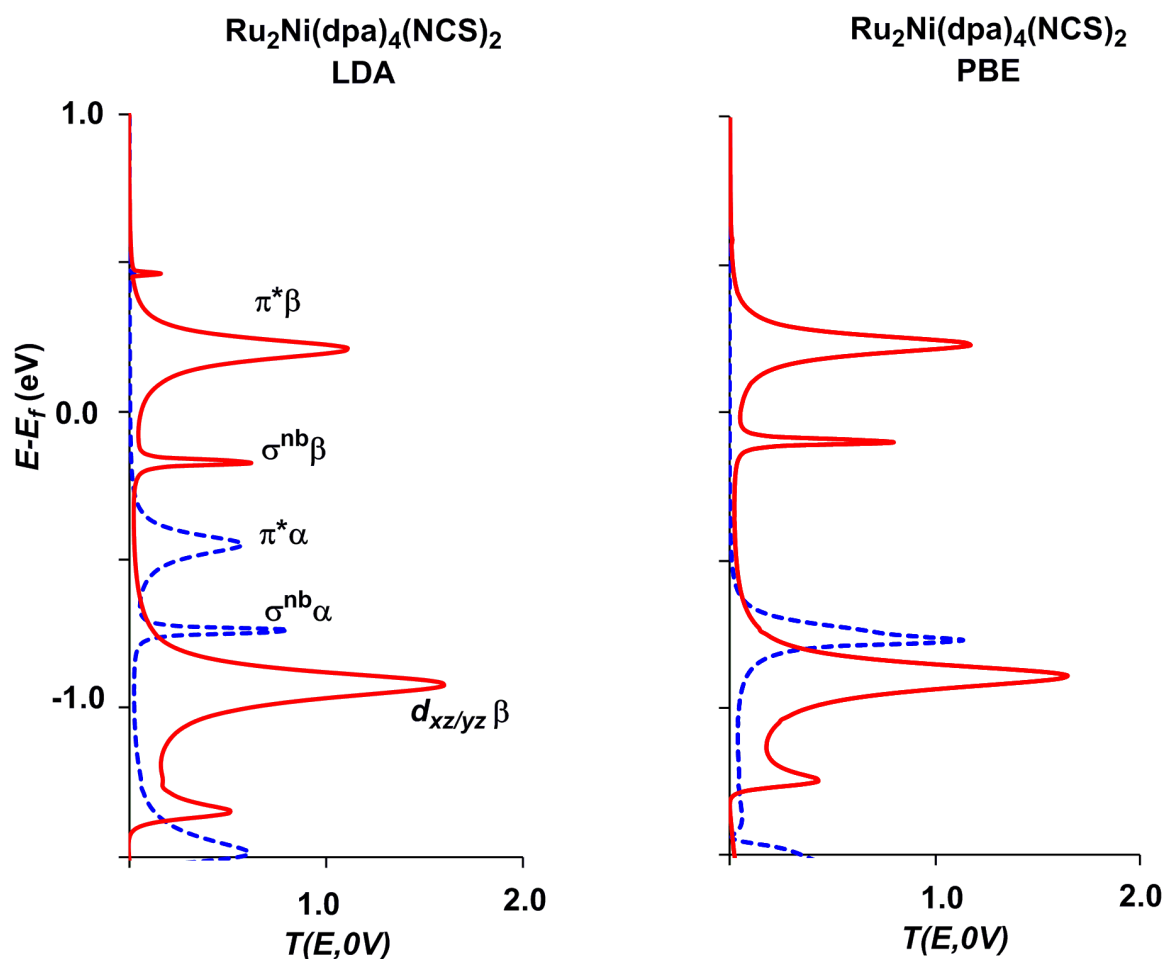

**Figure S2** Zero-bias transmission spectrum of  $\text{Ru}_2\text{Ni}(\text{dpa})_4(\text{NCS})_2$  using the LDA and PBE functionals.

#### 4. Dependence of transmission spectra on structure

In the main text it was noted that the linear geometry for  $\text{Ru}_2\text{Ni}(\text{dpa})_4(\text{NCS})_2$  does not correspond to a minimum on the potential energy surface – a slight bending is driven by a second-order Jahn-Teller instability. The transmission spectra shown below for linear and bent geometries shows that the effect of bending is marginal: the  $\pi^*$  peaks separate into two distinct components (their degeneracy is lifted by the distortion) but otherwise the key features are the same.

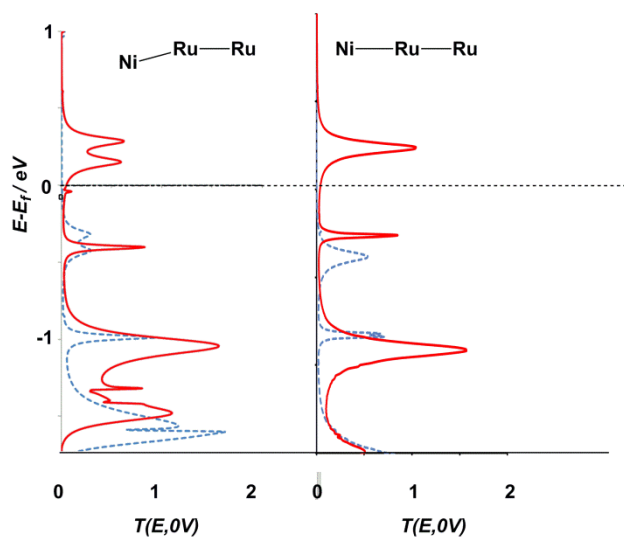

**Figure S3** Zero-bias transmission spectra of linear and bent  $\text{Ru}_2\text{Ni}(\text{dpa})_4(\text{NCS})_2$  (LDA+PZ functional).
